# Supplementary material for: Light Regulates the Cytokinin-Dependent Cold Stress Responses in Arabidopsis
Source: Frontiers journal article supplement (doi:10.3389/fpls.2020.608711), 2021-02-04
Supplement: Data_Sheet_2.PDF [file Data_Sheet_2.PDF]

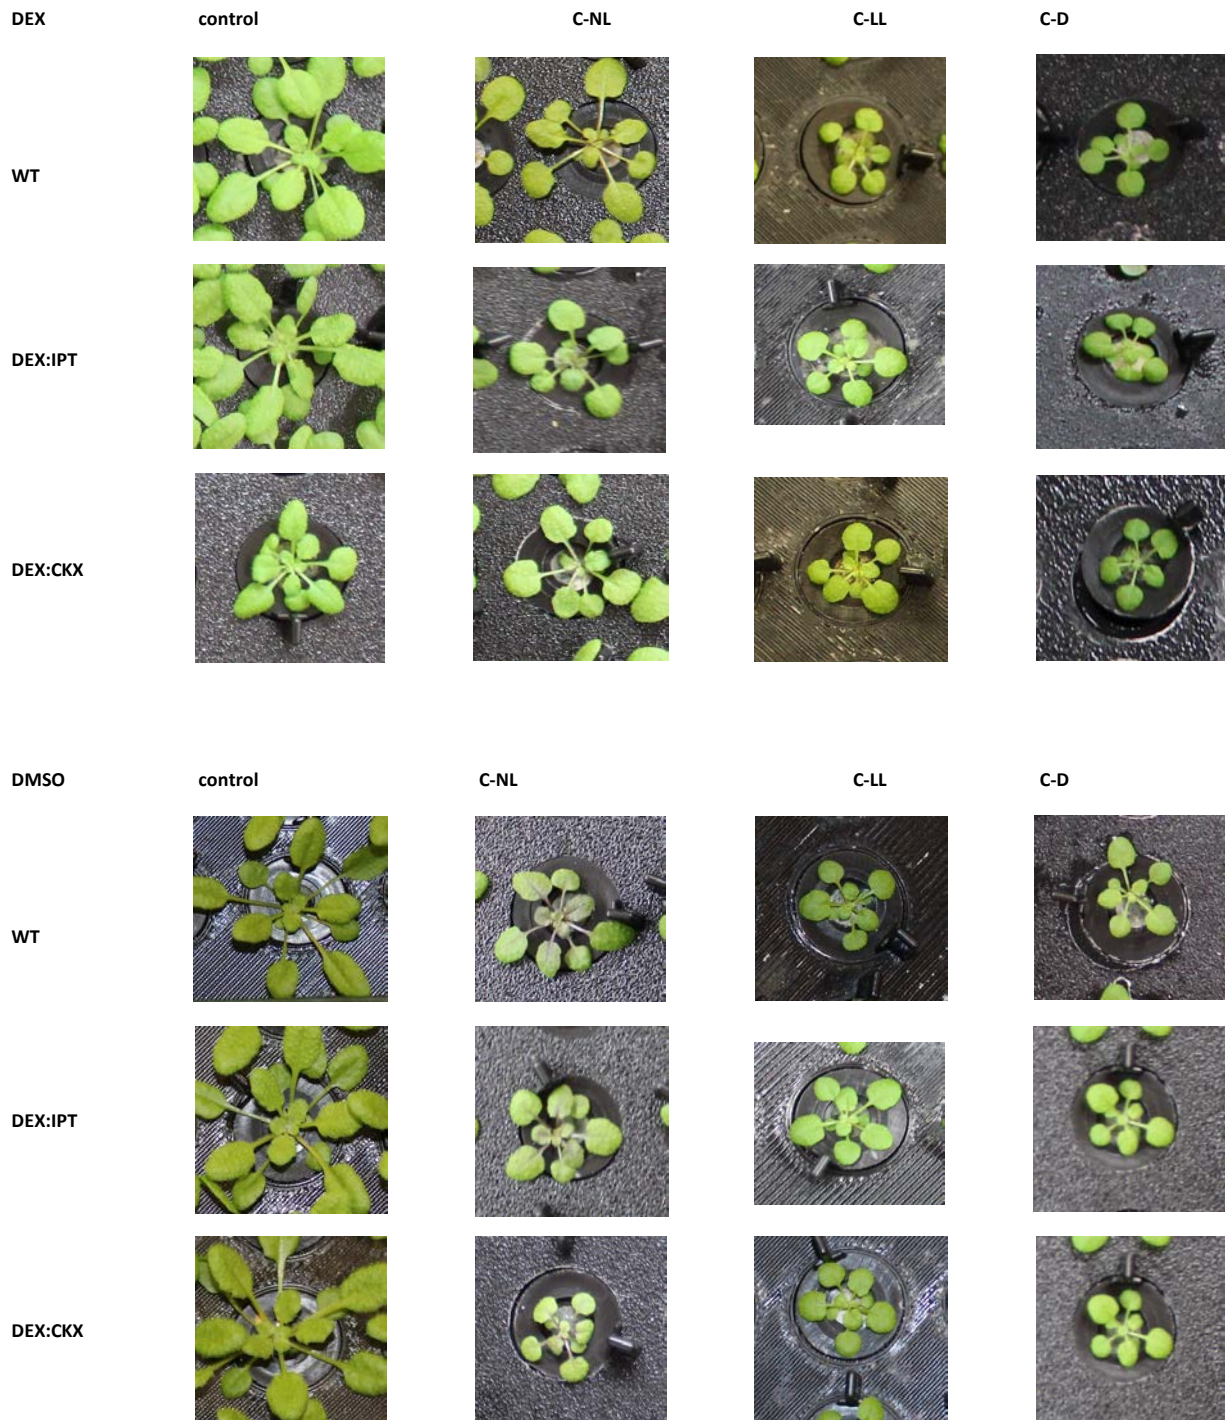

**Figure S2:** Phenotype of wild-type (WT) and transformants DEX:IPT and DEX:CKX exposed to control conditions ( $150 \mu\text{mol m}^{-2} \text{s}^{-1}$ ,  $20^\circ\text{C}$ ), cold under normal light (C-NL;  $150 \mu\text{mol m}^{-2} \text{s}^{-1}$ ,  $5^\circ\text{C}$ ), cold under low light (C-LL;  $20 \mu\text{mol m}^{-2} \text{s}^{-1}$ ,  $5^\circ\text{C}$ ) and cold under dark (C-D;  $0 \mu\text{mol m}^{-2} \text{s}^{-1}$ ,  $5^\circ\text{C}$ ). Plants were either activated with dexamethasone (DEX; diluted in DMSO) or treated with DMSO only.
